# Supplementary material
Source: publisher figshare collection journal article supplement (https://karger.figshare.com/articles/dataset/_/5125267)
Supplement: Supplementary file 1 [file 1]

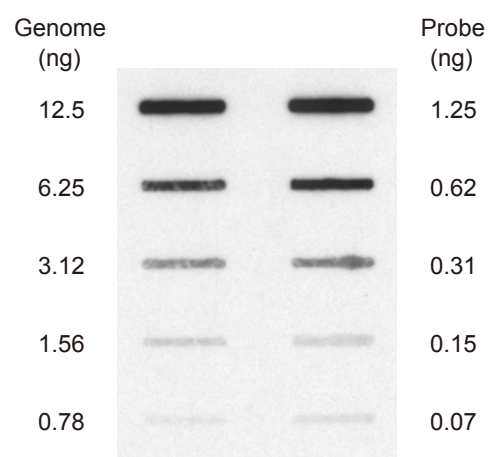

**Supplementary Figure 2.**

Quantification of NNO-*ApaI*-S repeated sequences in the genome by slot-blot hybridization. Five different concentrations of *N. n. orientalis* genomic DNA and PCR products from the NNO-*ApaI*-S fragment were blotted on a membrane and probed by hybridization with the NNO-*ApaI*-S fragment labeled with digoxigenin-11-dUTP.
