# Supplementary material
Source: publisher figshare collection journal article supplement (https://karger.figshare.com/articles/dataset/_/5125267)
Supplement: Supplementary file 2 [file 1]

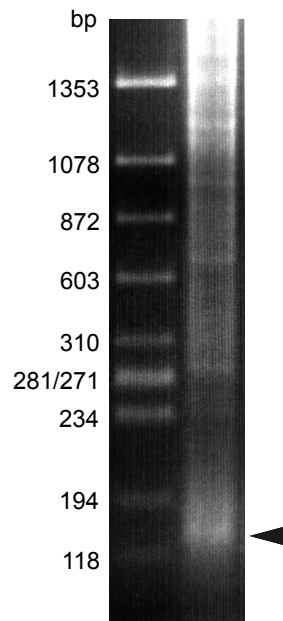

**Supplementary Figure 1.**

Ethidium bromide-stained gel for *N. n. orientalis* genomic DNA digested with *Apa*I (right lane). The most prominent DNA band in the *Apa*I-digest (arrowhead) was used for molecular cloning of repetitive sequences. A mixture of *Hind*III-digested  $\lambda$  phage DNA and *Hae*III-digested  $\phi$ X174 phage DNA was used as a molecular size marker (left lane).
