# Supplementary material
Source: publisher figshare collection journal article supplement (https://karger.figshare.com/articles/dataset/_/5125267)
Supplement: Supplementary file 3 [file 1]

Archive with 2 entries (2 files):
- 000352067_sm_Figure_1.pdf
- 000352067_sm_Figure_2.pdf
